# Supplementary material for: Survival after surgery for spinal metastases: a population-based study
Source: PubMed Central journal article supplement — Can J Surg. 2022 Aug 2;65(4):E512–8. doi: 10.1503/cjs.000921 (PMC9363129; doi:10.1503/cjs.000921), 2022-08-02
Supplement: CJS-000921-1-at.pdf [file CJS-000921-1-at.pdf]

## Appendix 1. Supplementary tables

**Table S1. Administrative data codes used to define vertebral surgical procedures**

| <b>Procedure Category</b>                                         | <b>Code</b>                                                                                                                           |
|-------------------------------------------------------------------|---------------------------------------------------------------------------------------------------------------------------------------|
| <b>Ontario Health Insurance Plan (OHIP) Fee Codes</b>             |                                                                                                                                       |
| Decompression/Vertebrectomy                                       | E373, E386, N500-N508, N510-N512, N579                                                                                                |
| Fusion                                                            | E366, E370, E371, E375, E377, E384, E387, N513-N515, N519, N528, N532, N572, N573, N582                                               |
| Fixation                                                          | N540                                                                                                                                  |
| Instrumentation/Removal of hardware                               | N541, N568                                                                                                                            |
| Spinal osteomyelitis (incision, drainage, sequestrectomy)         | N548-N550                                                                                                                             |
| Stereotactic Surgery                                              | N316, E378, E379                                                                                                                      |
| Kyphoplasty                                                       | N583, E392, E393                                                                                                                      |
| Vertebroplasty [J codes used between 2002 and 2005]               | E388, E391, J016, J054, N570                                                                                                          |
| Tumour Removal – Vertebral Spine [codes used prior to 2006]       | E914, N313, N314, N317                                                                                                                |
| <b>Canadian Classification of Health Intervention (CCI) Codes</b> |                                                                                                                                       |
| Any vertebral surgical procedure                                  | 1.AW.27, 1.AW.72, 1.SA.74, 1.SA.75, 1.SA.80, 1.SA.89, 1.SC.74, 1.SC.75, 1.SC.80, 1.SC.87, 1.SC.89, 1.SE.53, 1.SE.87, 1.SE.89, 1.SF.80 |

Note: Spinal surgical procedures were identified if any of the above OHIP fee codes AND if any of the above CCI codes appeared  $\pm 5$  days from the procedure OHIP fee code.

**Appendix 1** to Bhanot K, Widdifield J, Huan A, et al. Survival after surgery for spinal metastases: a population-based study. *Can J Surg* 2022. Copyright © 2022 The Author(s) or their employer(s). To receive this resource in an accessible format, please contact us at [cmajgroup.cmajca](mailto:cmajgroup.cmajca).

DOI: 10.1503/cjs.000921

*Online appendices are unedited and posted as supplied by the authors.*

**Table S2. International Classification of Diseases for Oncology, third edition (ICD-O-3) codes for identifying primary cancer by site**

| <b>Primary cancer site</b>                             | <b>Codes</b>                                                             |
|--------------------------------------------------------|--------------------------------------------------------------------------|
| Lung                                                   | C34.0–C34.9                                                              |
| Prostate                                               | C619                                                                     |
| Breast                                                 | C50.0-C50.9                                                              |
| Lymphoma                                               | C024, C098-C099, C111, C142, C379, C422, C770-C779                       |
| Myeloma                                                | C42, C77                                                                 |
| Urinary System (Kidney, Bladder, Renal Pelvis, Ureter) | C649, C659, C670-C679, C649, C659, C669, C680-C689                       |
| Lower gastrointestinal                                 | C180- C189, C260, C199, C209, C210-C212, C218                            |
| Upper gastrointestinal                                 | C150- C179                                                               |
| Thyroid                                                | C739                                                                     |
| Melanoma                                               | C440-C449                                                                |
| Liver, Pancreas, and Intrahepatic Bile Duct            | C220, C221, C239, C240-C249, C250-C259, C480, C481-C482, C268-C269, C488 |
| Other sites and unknown primaries                      | All other ICD-O codes                                                    |

**Table S3. Secondary Outcome Definitions**

| <b>Outcome</b>                      | <b>ICD-10 Codes</b>                                                                                                                                                                                                                                                                                                                                                                                                                                                                                                                                                                                                                                                                                                                                                                                                                                                                                                                                                                                                                                                                                                                                                                                                                                                                                                                                                                                                                                                                                                                                                                                                                                                                                                                                                                                                                                                                                                                                                                                                                                       |
|-------------------------------------|-----------------------------------------------------------------------------------------------------------------------------------------------------------------------------------------------------------------------------------------------------------------------------------------------------------------------------------------------------------------------------------------------------------------------------------------------------------------------------------------------------------------------------------------------------------------------------------------------------------------------------------------------------------------------------------------------------------------------------------------------------------------------------------------------------------------------------------------------------------------------------------------------------------------------------------------------------------------------------------------------------------------------------------------------------------------------------------------------------------------------------------------------------------------------------------------------------------------------------------------------------------------------------------------------------------------------------------------------------------------------------------------------------------------------------------------------------------------------------------------------------------------------------------------------------------------------------------------------------------------------------------------------------------------------------------------------------------------------------------------------------------------------------------------------------------------------------------------------------------------------------------------------------------------------------------------------------------------------------------------------------------------------------------------------------------|
| Vertebral Fracture during follow-up | An inpatient, same day record (SDS), or an ED visit (NACRS) with a most responsible diagnosis of spine fracture any diagnosis of spine fracture.<br><i>ICD-10 CODES:</i><br>S22.0 Fracture of thoracic vertebrae<br>S22.1 Multiple fractures of the thoracic spine<br>S32.0 Fracture of lumbar vertebra<br>S32.7 Multiple fractures of lumbar spine and pelvis<br>S32.8 Fracture and other and unspecified parts of lumbar spine and pelvis<br>M966 Fracture of bone following insertion of orthopaedic implant, joint prosthesis, or bone plate                                                                                                                                                                                                                                                                                                                                                                                                                                                                                                                                                                                                                                                                                                                                                                                                                                                                                                                                                                                                                                                                                                                                                                                                                                                                                                                                                                                                                                                                                                          |
| Complication of the surgery itself  | Complications of surgical and medical care (defined as any of these codes (in any position) ascertained from CIHI DAD or NACRS (ER) within 30 days of surgery.<br>T800, Air embolism following infusion, transfusion and therapeutic injection<br>T801, Vascular complications following infusion, transfusion and therapeutic injection<br>T802, Infections following infusion, transfusion and therapeutic injection<br>T803, ABO incompatibility reaction<br>T804, Rh incompatibility reaction<br>T805, Anaphylactic shock due to serum<br>T806, Other serum reactions<br>T808, Other complications following infusion, transfusion and therapeutic injection<br>T809, Unspecified complication following infusion, transfusion and therapeutic injection<br>T810, Haemorrhage and haematoma complicating a procedure, not elsewhere classified<br>T811, Shock during or resulting from a procedure, not elsewhere classified<br>T812, Accidental puncture and laceration during a procedure, not elsewhere classified<br>T813, Disruption of operation wound, not elsewhere classified<br>T814, Infection following a procedure, not elsewhere classified<br>T8150, Adhesions due to foreign body accidentally left in body cavity or operation wound following procedure<br>T8151, Obstruction due to foreign body accidentally left in body cavity or operation wound following procedure<br>T8152, Perforation due to foreign body accidentally left in body cavity or operation wound following a procedure<br>T8158, Other specified complication due to foreign body left in body cavity or operation wound following a procedure<br>T8159, Unspecified complication due to foreign body accidentally left in body cavity or operation wound following a procedure<br>T816, Acute reaction to foreign substance accidentally left during a procedure<br>T817, Vascular complications following a procedure, not elsewhere classified<br>T8180, Complication of inhalation therapy<br>T8181, Emphysema (subcutaneous) resulting from a procedure |

|                            |                                                                                                                                                                                                                                                                                                                                                                                                                                                                                                                                                                                                                                                                                                                                                                                                                                                                                                                                                                                                                                                                                                                                                                                                                                                                                                                                                                                                                                                                                                                                                                                                                                                                                                                                                                                                                                                                                                                                                                                                                                                                                                                                                                                                            |
|----------------------------|------------------------------------------------------------------------------------------------------------------------------------------------------------------------------------------------------------------------------------------------------------------------------------------------------------------------------------------------------------------------------------------------------------------------------------------------------------------------------------------------------------------------------------------------------------------------------------------------------------------------------------------------------------------------------------------------------------------------------------------------------------------------------------------------------------------------------------------------------------------------------------------------------------------------------------------------------------------------------------------------------------------------------------------------------------------------------------------------------------------------------------------------------------------------------------------------------------------------------------------------------------------------------------------------------------------------------------------------------------------------------------------------------------------------------------------------------------------------------------------------------------------------------------------------------------------------------------------------------------------------------------------------------------------------------------------------------------------------------------------------------------------------------------------------------------------------------------------------------------------------------------------------------------------------------------------------------------------------------------------------------------------------------------------------------------------------------------------------------------------------------------------------------------------------------------------------------------|
|                            | <p>T8182, Persistent postoperative fistula<br/>           T8188, Other complications of procedures, not elsewhere classified<br/>           T819, Unspecified complication of procedure<br/>           T8423, Mechanical complication of internal fixation device of spinal vertebrae<br/>           T8424, Mechanical complication of internal fixation device of pelvis<br/>           T8428, Mechanical complication of internal fixation device of other bones<br/>           T843, Mechanical complication of other bone devices, implants and grafts<br/>           T844, Mechanical complication of other internal orthopaedic devices, implants and grafts<br/>           T8458, Infection and inflammatory reaction due to other joint prosthesis<br/>           T8459, Infection and inflammatory reaction due to unspecified joint prosthesis<br/>           T8468, Infection and inflammatory reaction due to internal fixation device of bones at other site<br/>           T8469, Infection and inflammatory reaction due to internal fixation device of bones of limb NOS<br/>           T847, Infection and inflammatory reaction due to other internal orthopaedic prosthetic devices, implants and grafts<br/>           T848, Other complications of internal orthopaedic prosthetic devices, implants and grafts<br/>           T849, Unspecified complication of internal orthopaedic prosthetic device, implant and graft<br/>           T880, Infection following immunization<br/>           T881, Other complications following immunization, not elsewhere classified<br/>           T882, Shock due to anaesthesia<br/>           T883, Malignant hyperthermia due to anaesthesia<br/>           T884, Failed or difficult intubation<br/>           T885, Other complications of anaesthesia<br/>           T886, Anaphylactic shock due to adverse effect of correct drug or medicament properly administered<br/>           T887, Unspecified adverse effect of drug or medicament<br/>           T888, Other specified complications of surgical and medical care, not elsewhere classified<br/>           T889, Complication of surgical and medical care, unspecified</p> |
| Deep vein thrombosis (DVT) | <p><b><u>Hospitalized DVT</u></b><br/>           I801, Phlebitis and thrombophlebitis of femoral vein<br/>           I802, Phlebitis and thrombophlebitis of other deep vessels of lower extremities<br/>           I803, Phlebitis and thrombophlebitis of lower extremities, unspecified<br/>           I809, Phlebitis and thrombophlebitis of unspecified site<br/>           I822, Embolism and thrombosis of vena cava<br/>           I823, Embolism and thrombosis of renal vein<br/>           I828, Embolism and thrombosis of other specified veins<br/>           I829, Embolism and thrombosis of unspecified vein</p>                                                                                                                                                                                                                                                                                                                                                                                                                                                                                                                                                                                                                                                                                                                                                                                                                                                                                                                                                                                                                                                                                                                                                                                                                                                                                                                                                                                                                                                                                                                                                                         |
| Pulmonary embolism         | <p>I260, Pulmonary embolism with mention of acute cor pulmonale<br/>           I269, Pulmonary embolism without mention of acute cor pulmonale</p>                                                                                                                                                                                                                                                                                                                                                                                                                                                                                                                                                                                                                                                                                                                                                                                                                                                                                                                                                                                                                                                                                                                                                                                                                                                                                                                                                                                                                                                                                                                                                                                                                                                                                                                                                                                                                                                                                                                                                                                                                                                         |
| Major vascular event       | <p><b><u>Hospitalized Vascular Events</u></b><br/>           I21 to I22, Acute myocardial infarction</p>                                                                                                                                                                                                                                                                                                                                                                                                                                                                                                                                                                                                                                                                                                                                                                                                                                                                                                                                                                                                                                                                                                                                                                                                                                                                                                                                                                                                                                                                                                                                                                                                                                                                                                                                                                                                                                                                                                                                                                                                                                                                                                   |

**Appendix 1** to Bhanot K, Widdifield J, Huan A, et al. Survival after surgery for spinal metastases: a population-based study. *Can J Surg* 2022. Copyright © 2022 The Author(s) or their employer(s). To receive this resource in an accessible format, please contact us at [cmajgroup.cmajca](mailto:cmajgroup.cmajca).

DOI: 10.1503/cjs.000921

*Online appendices are unedited and posted as supplied by the authors.*

I60, I61, I63 (excluding I63.6), I64, H341, Stroke

**Abbreviations:**

CIHI: Canadian Institute for Health Information

SDS: Same Day Surgery Database.

DAD: Discharge Abstract Database

NACRS: National Ambulatory Care Reporting System

DOI: 10.1503/cjs.000921

Online appendices are unedited and posted as supplied by the authors.

**Supplementary Table 4.** Prevalence of 30-day readmission or complication following surgery for spinal metastases according to year of surgery, 2006-2016

| Outcome                                                                                                    | Year | 2006          | 2007          | 2008          | 2009          | 2010          | 2011          | 2012          | 2013          | 2014          | 2015          | 2016          |
|------------------------------------------------------------------------------------------------------------|------|---------------|---------------|---------------|---------------|---------------|---------------|---------------|---------------|---------------|---------------|---------------|
| Individuals readmitted to hospital within 30 days post-surgery, n (%)                                      |      | 34<br>(24.5%) | 48<br>(23.5%) | 42<br>(18.5%) | 41<br>(16.6%) | 54<br>(23.6%) | 48<br>(18.9%) | 50<br>(21.6%) | 62<br>(21.8%) | 52<br>(20.2%) | 70<br>(24.4%) | 52<br>(18.2%) |
| Individuals with at least one surgical complication or any major event* within 30 days post-surgery, n (%) |      | 12<br>(8.6%)  | 19<br>(9.3%)  | 17<br>(7.5%)  | 18<br>(7.3%)  | 32<br>(14.0%) | 24<br>(9.4%)  | 13<br>(5.6%)  | 20<br>(7.0%)  | 19<br>(7.4%)  | 39<br>(13.6%) | 27<br>(9.5%)  |
| Complication of the surgery itself, n (%)                                                                  |      | 16<br>(11.5%) | 27<br>(13.2%) | 27<br>(11.9%) | 23<br>(9.3%)  | 37<br>(16.2%) | 29<br>(11.4%) | 22<br>(9.5%)  | 30<br>(10.5%) | 29<br>(11.3%) | 48<br>(16.7%) | 35<br>(12.3%) |
